# Supplementary material for: Acupuncture, counselling or usual care for depression and comorbid pain: secondary analysis of a randomised controlled trial
Source: HighWire-hosted journal article supplement (doi:10.1136/bmjopen-2014-004964), 2014-05-01
Supplement: bmjopen-2014-004964supp.pdf [file bmjopen-2014-004964supp.pdf]

**SUPPLEMENT 1.**

**A series of regression analyses to identify variables predicting poor outcome of treatment for depression at 3 months.**

| <b>Table 3. Univariate analyses of potential predictors of PHQ-9 depression at 3 months, controlling for baseline PHQ-9 (NB *denotes p&lt;0.10)</b> |             |                  |                                |              |
|-----------------------------------------------------------------------------------------------------------------------------------------------------|-------------|------------------|--------------------------------|--------------|
| <b>Demographic Items</b>                                                                                                                            | <b>Beta</b> | <b>Std Error</b> | <b>95% Confidence interval</b> | <b>Sig p</b> |
| Age                                                                                                                                                 | -0.003      | 0.018            | -.036 to 0.33                  | 0.853        |
| Sex*                                                                                                                                                | -1.076      | 0.522            | -2.10 to 0.05                  | 0.040        |
| Age left education                                                                                                                                  | -0.027      | 0.055            | -0.13 to 0.82                  | 0.633        |
| Employment*                                                                                                                                         | -0.377      | 0.113            | 0.15 to 0.59                   | 0.001        |
| Painful health or medical condition*                                                                                                                | 1.597       | 0.462            | 0.68 to 2.5                    | 0.001        |
| N Episodes of depression                                                                                                                            | 0.056       | 0.139            | -0.21 to 0.32                  | 0.685        |
| Age at onset of depression                                                                                                                          | -0.008      | 0.019            | 0.04 to 0.28                   | 0.653        |
| Medication- Analgesics*                                                                                                                             | -0.005      | 0.008            | -0.10 to 0.01                  | 0.115        |
| Medication - Antidepressants                                                                                                                        | 0.800       | 0.501            | -0.18 to 1.78                  | 0.111        |
| Expectations of allocated treatment                                                                                                                 | 0.701       | 0.273            | -0.16 to 1.23                  | 0.11         |
| Preference for treatment                                                                                                                            | 0.005       | 0.003            | -0.11 to 0.11                  | 0.710        |
| <b>BDI-II Items</b>                                                                                                                                 |             |                  |                                |              |
| 1. Sadness                                                                                                                                          | 0.223       | 0.389            | -0.54 to 0.98                  | 0.566        |
| 2. Pessimism                                                                                                                                        | 0.164       | 0.308            | -0.44 to 0.76                  | 0.594        |
| 3. Past Failure                                                                                                                                     | 0.618       | 0.316            | -0.002 to 1.23                 | 0.510        |
| 4. Loss of Pleasure                                                                                                                                 | 0.164       | 0.366            | -0.55 to 0.88                  | 0.654        |
| 5. Guilty feelings                                                                                                                                  | 0.262       | 0.278            | -0.28 to 0.80                  | 0.346        |
| 6. Punishment feelings                                                                                                                              | 0.310       | 0.206            | -0.94 to 0.71                  | 0.133        |
| 7. Self-Dislike                                                                                                                                     | 0.415       | 0.281            | -0.13 to 0.96                  | 0.141        |
| 8. Self Criticalness                                                                                                                                | 0.088       | 0.268            | -0.43 to 0.61                  | 0.742        |
| 9. Suicidal thoughts or Wishes*                                                                                                                     | 0.120       | 0.392            | -0.24 to 1.79                  | 0.480        |
| 10. Crying                                                                                                                                          | 0.029       | 0.226            | 0.89 to -0.41                  | 0.226        |
| 11. Agitation                                                                                                                                       | -0.375      | 0.307            | -0.97 to 0.22                  | 0.222        |
| 12. Loss of Interest                                                                                                                                | -0.472      | 0.301            | -0.63 to 0.54                  | 0.877        |
| 13. Indecisiveness                                                                                                                                  | 0.444       | 0.254            | -0.05 to 0.90                  | 0.081        |
| 14. Worthlessness*                                                                                                                                  | 0.697       | 0.308            | 0.09 to 1.83                   | 0.024        |
| 15. Loss of Energy*                                                                                                                                 | 1.135       | 0.124            | 0.43 to 1.83                   | 0.001        |
| 16. Changes in sleeping pattern                                                                                                                     | 0.170       | 0.280            | -0.38 to 0.72                  | 0.547        |
| 17. Irritability                                                                                                                                    | 0.178       | 0.277            | -0.36 to 0.72                  | 0.520        |
| 18. Changes in appetite                                                                                                                             | 0.269       | 0.251            | -0.22 to 0.76                  | 0.285        |
| 19. Concentration Difficulty                                                                                                                        | 0.683       | 0.352            | -0.009 to 1.37                 | 0.653        |
| 20. Tiredness or fatigue*                                                                                                                           | 0.714       | 0.339            | 0.04 to 1.37                   | 0.035        |
| 21. Loss of Interest in Sex                                                                                                                         | 0.235       | 0.212            | -0.18 to 0.65                  | 0.267        |
| <b>Other EQ-5D Variables at baseline</b>                                                                                                            |             |                  |                                |              |
| Mobility*                                                                                                                                           | 2.617       | 0.573            | 1.49 to 3.73                   | 0.001        |
| Self-Care *                                                                                                                                         | 0.164       | 0.147            | 1.45 to 4.38                   | 0.001        |
| Activity*                                                                                                                                           | 1.764       | 0.422            | 0.93 to 0.63                   | 0.001        |
| Anxiety                                                                                                                                             | 0.164       | 0.580            | -0.97 to 1.30                  | 0.777        |

| Predictor variable                                                                       | $\beta$ | Std Error | 95% Confidence Interval | Sig p |
|------------------------------------------------------------------------------------------|---------|-----------|-------------------------|-------|
| Constant                                                                                 | 5.170   | 1.336     | 2.54 to 7.79            | 0.001 |
| Pain group/no pain group allocation based on EQ-5D* ( being in moderate to extreme pain) | -0.777  | 0.463     | -1.68 to 0.13           | 0.094 |
| Baseline EQ-5D Self-Care                                                                 | 1.063   | 0.600     | -0.11 to 2.24           | 0.329 |
| Baseline prescribed analgesics                                                           | -0.002  | 0.002     | -0.007. to -0.02        | 0.272 |
| Baseline EQ-5D Performing usual activity                                                 | 0.272   | 0.401     | -0.51 to 1.06           | 0.497 |
| Type of health problem                                                                   | -0.111  | 0.154     | -0.41 to 0.19           | 0.473 |
| BDI-II Question 9<br>"Suicidal thoughts or wishes"                                       | 0.712   | 0.406     | -0.08 to 1.76           | 0.801 |
| BDI-II Question 15<br>"Loss of energy"*                                                  | 0.644   | 0.355     | -0.55 to 1.13           | 0.071 |
| Previous episodes of depression                                                          | 0.044   | 0.115     | -0.22 to 0.23           | 0.974 |
| Baseline BDI-II Question 16<br>"Changes in sleeping pattern"                             | 0.052   | 0.234     | -0.40 to 0.51           | 0.825 |
| Sex- (being male)*                                                                       | -0.840  | 0.436     | -1.69 to -0.15          | 0.054 |
| Employment                                                                               | 0.142   | 0.099     | -0.05 to 0.33           | 0.151 |
| Baseline BDI Question 20<br>"Tiredness or fatigue"                                       | 0.013   | 0.326     | -0.62 to 0.652          | 0.968 |
| EQ-5D mobility at baseline*                                                              | 1.760   | 0.635     | 0.51 to 3.00            | 0.006 |
| Baseline PHQ-9 score*                                                                    | 0.480   | 0.047     | 0.38 to 0.573           | 0.000 |

| Predictor variable                                                                      | $\beta$ | Std Error | 95% Confidence Interval | Sig p |
|-----------------------------------------------------------------------------------------|---------|-----------|-------------------------|-------|
| Constant                                                                                | 4.605   | 1.457     | 1.74 to 7.46            | .002  |
| Pain group/no pain group allocation based on EQ-5D* (being in moderate to extreme pain) | -1.011  | 0.507     | -2.00 to -0.15          | .047  |
| EQ-5D mobility at baseline                                                              | 1.760   | 0.635     | 0.51 to 3.00            | .006  |
| BDI-II q15Loss of energy at baseline                                                    | 0.922   | 0.355     | 0.922 to 1.62           | .010  |
| Sex- (being male)                                                                       | 1.036   | 0.512     | -2.04 to -0.32          | .043  |
| PHQ-9 score at baseline                                                                 | 0.480   | 0.047     | 0.38 to 0.57            | .000  |
